# Supplementary material for: New azaborine-thiophene heteroacenes
Source: Royal Society of Chemistry journal article supplement (doi:10.1039/c0cc01963a), 2010-01-01

## SUPPORTING INFORMATION

for

# New azaborine–thiophene heteroacenes

Marc Lepeltier, Olena Lukoyanova, Alex Jacobson, Shehzad Jeeva, Dmitrii F. Perepichka\*

*Department of Chemistry, McGill University, Montreal, Quebec H3A 2K6, Canada*

## Experimental Part

### *Materials and Methods*

All reactions were carried under dry nitrogen or argon atmosphere (specified in procedure). The reagents *n*-butyllithium (2.0 M in hexanes), tributyltin chloride, palladium (II) chloride (Alfa Aesar), tin (II) chloride, glyoxal, phenyl dichloroborane, triethylamine were obtained commercially and used as received. Fuming nitric acid was prepared in the laboratory. All solvents were of at least reagent grade and dried if necessary.

<sup>1</sup>H NMR and <sup>13</sup>C NMR spectra were run on a Varian Mercury 300 or 400 MHz NMR spectrometer. Low-resolution mass spectra (70 eV, EI and ESI) were run on a Kratos 7525 RFA or Finnigan LCQ DUO mass spectrometer. UV-vis spectra were measured with a Varian Cary 5000 spectrometer in 1 cm cuvettes (in CH<sub>2</sub>Cl<sub>2</sub> solutions). Fluorescence spectra were measured with a Varian Eclipse spectrofluorometer, in 1 cm cuvettes (in CH<sub>2</sub>Cl<sub>2</sub> solutions). Quantum yield was determined relative to 9,10-diphenylanthracene ( $\Phi_{\text{PL}} = 90\%$ ).

*Electrochemical Measurements:* All electrochemical measurements were performed at room temperature in a three-electrode cell using a CHI-770 Electrochemical Workstation. Electrochemical investigations were conducted in anhydrous CH<sub>2</sub>Cl<sub>2</sub> with a Pt disk (d=1.6 mm) as the working electrode, platinum wire as the auxiliary electrode and Ag/AgCl reference electrode. Bu<sub>4</sub>ClO<sub>4</sub> (0.1 M) was used as a supporting electrolyte. The electrolyte solution was purged with Ar gas before and between electrochemical measurements. The redox potential of Fc/Fc<sup>+</sup> couple in our conditions occurred at 0.50 V vs. Ag/AgCl.

*X-ray Measurements.* Needles of **1a** and **1b** was mounted on a nylon loop with paratone. X-ray data were collected at 100 K using omega scans with a Bruker APEX I CCD detector on a D8 3-circle goniometer and Mo KR ( $\lambda$  ) 0.71073 Å) radiation. The data were scanned using Bruker's SMART program and integrated using Bruker's SAINT software.<sup>1</sup> The structure was solved by direct methods using SHELXS-97<sup>2</sup> and refined by a least-squares methods on F<sub>2</sub> using SHELXL-97 incorporated in the SHELXTL<sup>433</sup> suite of programs.

*Description of Density Functional Theory Calculations (DFT).* All calculations were performed on neutral closed shell molecules with density functional theory at B3LYP/6-311G(d,p) level implemented in GAUSSIAN 03W.<sup>4</sup> Default convergence criteria and no symmetry constrains were used.

Reorganization energy  $\lambda$  was calculated as the difference between the total energy of radical cation in the optimized geometry and in the geometry of a neutral molecule ( $\lambda_+$ ) plus the difference between the total energy of a neutral molecule in the optimized geometry and in the geometry of a radical cation ( $\lambda_0$ ).

---

<sup>1</sup> Bruker (2006). SAINT Release 7.34A. Integration Software for Single Crystal Data. Bruker AXS Inc., Madison, USA.

<sup>2</sup> Sheldrick, G. M. (1997). SHELXS97. Program for Crystal Structure solution. University of Göttingen, Germany.

<sup>3</sup> Bruker (1997). SHELXTL (1997). Release 5.10; The Complete Software Package for Single Crystal Structure Determination. Bruker AXS Inc., Madison, USA.

<sup>4</sup> Gaussian 03, Revision C.02, M. J. Frisch, G. W. Trucks, H. B. Schlegel, G. E. Scuseria, M. A. Robb, J. R. Cheeseman, J. A. Montgomery, Jr., T. Vreven, K. N. Kudin, J. C. Burant, J. M. Millam, S. S. Iyengar, J. Tomasi, V. Barone, B. Mennucci, M. Cossi, G. Scalmani, N. Rega, G. A. Petersson, H. Nakatsuji, M. Hada, M. Ehara, K. Toyota, R. Fukuda, J. Hasegawa, M. Ishida, T. Nakajima, Y. Honda, O. Kitao, H. Nakai, M. Klene, X. Li, J. E. Knox, H. P. Hratchian, J. B. Cross, V. Bakken, C. Adamo, J. Jaramillo, R. Gomperts, R. E. Stratmann, O. Yazyev, A. J. Austin, R. Cammi, C. Pomelli, J. W. Ochterski, P. Y. Ayala, K. Morokuma, G. A. Voth, P. Salvador, J. J. Dannenberg, V. G. Zakrzewski, S. Dapprich, A. D. Daniels, M. C. Strain, O. Farkas, D. K. Malick, A. D. Rabuck, K. Raghavachari, J. B. Foresman, J. V. Ortiz, Q. Cui, A. G. Baboul, S. Clifford, J. Cioslowski, B. B. Stefanov, G. Liu, A. Liashenko, P. Piskorz, I. Komaromi, R. L. Martin, D. J. Fox, T. Keith, M. A. Al-Laham, C. Y. Peng, A. Nanayakkara, M. Challacombe, P. M. W. Gill, B. Johnson, W. Chen, M. W. Wong, C. Gonzalez, and J. A. Pople, Gaussian, Inc., Wallingford CT, 2004.

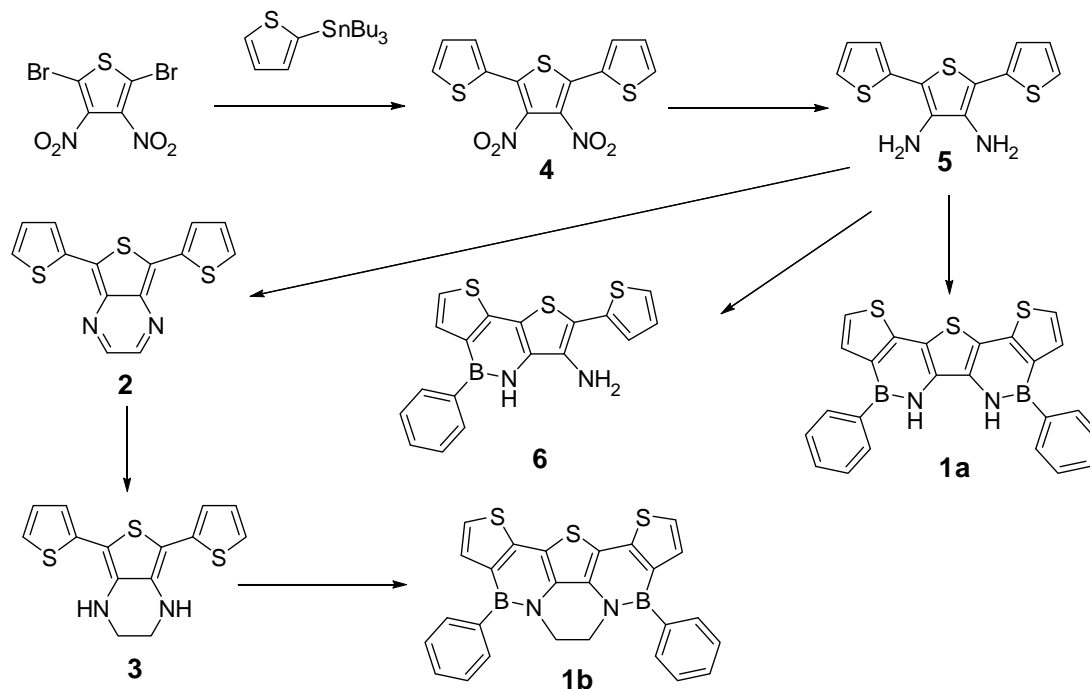

**2,5-Bis(2-thienyl)-3,4-dinitrothiophene (4).** This was synthesized by Stille coupling of 2,5-dibromo-3,4-dinitrothiophene<sup>5</sup> with tributyl-2-thienylstannane as described previously.<sup>6</sup> <sup>1</sup>H NMR (400 MHz, CDCl<sub>3</sub>, ppm): 7.61 (dd, *J* = 5.2, 1.2 Hz, 2H), 7.55 (dd, *J* = 4.0, 1.2 Hz, 2H), 7.18 (dd, *J* = 5.2, 4.0 Hz, 2H).

**2,5-Bis(2-thienyl)-3,4-diaminothiophene (5).** This was synthesized by modified published procedure<sup>7</sup> with an improved yield. To a solution of 2,5-bis(2-thienyl)-3,4-dinitrothiophene (5.0 g, 14.8 mmol) in ethanol (200 mL) and concentrated HCl (100 mL) under argon was added SnCl<sub>2</sub>×2H<sub>2</sub>O (60 g, 267 mmol). The reaction mixture was refluxed for 15 h. Then, the mixture was poured into aqueous KOH (25 %) to basify the solution. The solution was filtered and the product was extracted with toluene (3×150 mL). The organic phase was dried over MgSO<sub>4</sub> and the solvent was evaporated. The product was purified by chromatography on silica gel to give the desired product as a yellow powder (3.12 g, 76 %), <sup>1</sup>H NMR (300 MHz, CDCl<sub>3</sub>, ppm): 7.27 (dd, *J* = 4.5, 1.5 Hz, 2H), 7.09 (m, 4H), 3.74 (s, 4H).

<sup>5</sup> D. D. Kenning, K. A. Mitchell, T. R. Calhoun, M. R. Funfar, D. J. Sattler, S. C. Rasmussen *J. Org. Chem.* **2002**, 67, 9073

<sup>6</sup> Y. Xia, J. Luo, X. Deng, X. Li, X. Zhu, W. Yang, Y. Cao, *Macromol. Chem. Phys.*, **2006**, 207, 511

<sup>7</sup> C. Kitamura, S. Tanaka, Y. Yamashita, *Chem. Mater.*, **1996**, 8, 570

**5,7-bis(2-thienyl)thieno[3,4-*b*]pyrazine (2).** This was synthesized according to procedure.<sup>7</sup> To a solution of **5** (1.026 g, 3.70 mmol) in ethanol (20 mL) under argon was added glyoxal (40 % in water) (0.29 mL, 1.98 mmol) and Na<sub>2</sub>CO<sub>3</sub> (3.92 g, 37.0 mmol). The reaction mixture was refluxed for 2h, the reaction turned purple. Then, water was added (50 mL) and the product was extracted by 3 × 50 mL of diethyl ether. The organic phase was dried over MgSO<sub>4</sub> and the solvent was evaporated. The product was purified by chromatography on silica gel to give product pyrazine **2** as a purple powder (1.10 g, 99 %). <sup>1</sup>H NMR (400 MHz, CDCl<sub>3</sub>, ppm): 8.54 (s, 2H), 7.65 (dd, *J* = 4.0 Hz, *J* = 1.2 Hz, 2H), 7.42 (dd, *J* = 5.2 Hz, *J* = 1.2 Hz, 2H), 7.14 (dd, <sup>3</sup>*J* = 5.2 Hz, <sup>3</sup>*J* = 4.0 Hz, 2H).

**Ethylenediaminoterthiophene (3)** To a solution of **2** (0.38 g, 1.26 mmol) in ethanol (10 mL) under argon was added NaBH<sub>4</sub> (2.4 g, 63 mmol). The reaction mixture was refluxed for 1h, the solution turned orange. Then water was added (20 mL) and the product was extracted by 3 x 50 mL of ethyl acetate. The organic phase was dried over MgSO<sub>4</sub> and the solvent was evaporated. Quick filtration through a silica gel plug gave intermediate **3** as yellow powder (0.39 g, 99 %) which was of sufficient purity for further reaction (>95% by NMR). <sup>1</sup>H NMR (300 MHz, CDCl<sub>3</sub>, ppm): 7.21 (m, 2H), 7.06 (m, 4H), 4.30 (br. s, 2H), 3.42 (s, 4H). We note that the product should be isolated/purified rapidly and stored under nitrogen as prolonged exposure to air leads to oxidation.

**Azaborine (1a).** To a solution of 2,5-bis(2-thienyl)-3,4-diaminothiophene **5** (1.00 g, 3.60 mmol) in chlorobenzene (50 mL) under argon was added phenyldichloroborane (1.71 g, 10.8 mmol) and triethylamine (2 mL, 14 mmol). The reaction mixture was refluxed for 48h. Then the solvent was evaporated and the product was purified by chromatography on silica gel to give product **1a** as yellow powder (1.40 g, 86 %), m.p. 216 °C. <sup>1</sup>H NMR (300 MHz, CDCl<sub>3</sub>, ppm): 8.37 (br. s, 2H), 7.91 (m, 4H), 7.77 (d, <sup>3</sup>*J* = 5.0 Hz, 2H), 7.53 (m, 6H), 7.36 (d, <sup>3</sup>*J* = 5.0 Hz, 2H). <sup>13</sup>C NMR (125.8 MHz, CDCl<sub>3</sub>, ppm): 148.6, 133.4, 131.9, 130.2, 129.5, 128.6, 123.4, 117.0.<sup>8</sup> MS (ESI) *m/z* = 449.52 (100 %) [M-H]<sup>+</sup>. C<sub>24</sub>H<sub>16</sub>S<sub>3</sub>B<sub>2</sub>N<sub>2</sub>: Calcd. C 64.03, H 3.58, N 6.22; Found C 64.12, H 3.72, N 6.20.

**Azaborine (1b).** To a solution of ethylenediaminoterthiophene **3** (0.392 g, 1.29 mmol) in chlorobenzene (50 mL) under argon was added phenyldichloroborane (0.43 mL, 3.22 mmol) and triethylamine (0.6 mL, 3.9 mmol). The reaction mixture refluxed overnight, then the solvent was evaporated in vacuo and the product was purified by chromatography on silica gel to give product **1b** as yellow powder (0.33 g, 54 %), m.p. 224-226 °C. <sup>1</sup>H NMR (300 MHz, CDCl<sub>3</sub>, ppm): 7.66 (m, 4H),

<sup>8</sup> <sup>13</sup>C NMR signal for the carbon attached to boron is not observed due to coupling with adjacent <sup>11</sup>B.

7.48 (m, 8H), 7.27 (d,  $J = 5.1$  Hz, 2H), 4.31 (s, 4H).  $^{13}\text{C}$  NMR (125.8 MHz,  $\text{CDCl}_3$ , ppm): 146.7, 139.8 (br), 138.4 (br), 133.7, 132.7, 131.0, 128.4, 128.1, 122.7, 116.2, 46.2. MS (ESI)  $m/z = 476.0$   $[\text{M}]^+$ .  $\text{C}_{26}\text{H}_{18}\text{S}_3\text{B}_2\text{N}_2$ : Calcd. C 65.57, H 3.81, N 5.88, S 20.20; Found C 65.11, H 3.74, N 5.95, S 19.91. The reaction was repeated with 0.75 g of **3** without heating (stirring overnight); the purification as above gave the same product **1b** (0.51 g, 42%).

**Azaborine (6).** To a solution of 2,5-bis(2-thienyl)-3,4-diaminothiophene **4** (106 mg, 0.381 mmol) in chlorobenzene (50 mL) under argon was added phenyldichloroborane (60  $\mu\text{L}$ , 0.45 mmol). The reaction mixture was refluxed for 2 h and the solvent was evaporated. Excess of triethylamine (3 drops) was added and the product was purified by chromatography on silica gel (EtOAc/hexane) to give product **6** as a yellow-brownish solid which rapidly decomposes on storage (45 mg, 32 %).  $^1\text{H}$  NMR (400 MHz,  $\text{CDCl}_3$ , ppm): 8.01 (br. s, 1H, NH), 7.88 (dd,  $J = 7.6$  Hz, 2H, *o*-H), 7.75 (d,  $J = 5.2$  Hz, 1H, *th*-H), 7.50 (m, 3H, *m*-,*p*-H), 7.35 (d,  $J = 4.8$  Hz, 1H, *th*-H), 7.31 (d,  $J = 5.2$  Hz, 1H, *th*-H), 7.21 (d,  $J = 3.6$  Hz, 1H, *th*-H), 7.13 (dd,  $J = 4.8$  and 3.6 Hz, 1H, *th*-H), 3.5 (br, 2H,  $\text{NH}_2$ ). MS (EI)  $m/z = 364$   $[\text{M}]^+$ .

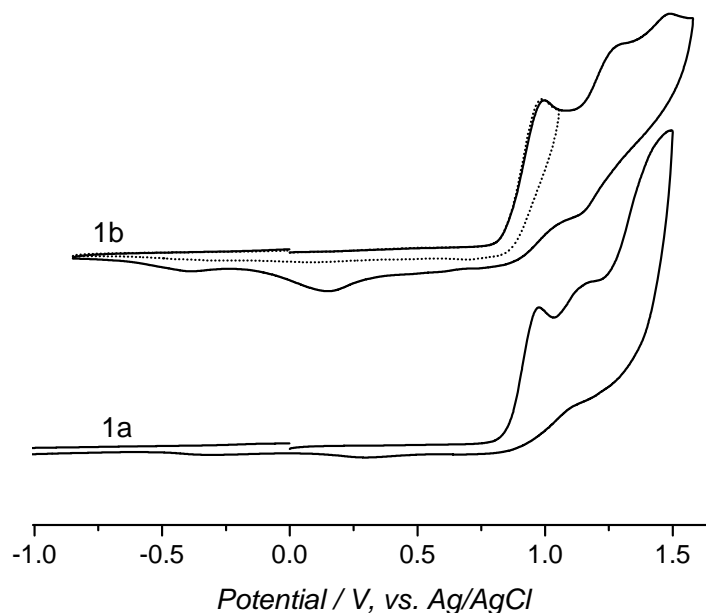

**Fig. S1.** CVs of **1a** (bottom curve) and **1b** (top curves) in 0.1 M  $\text{Bu}_4\text{NClO}_4/\text{CH}_2\text{Cl}_2$ , scan rate 0.1  $\text{V s}^{-1}$ .

## Fluoride titration experiments

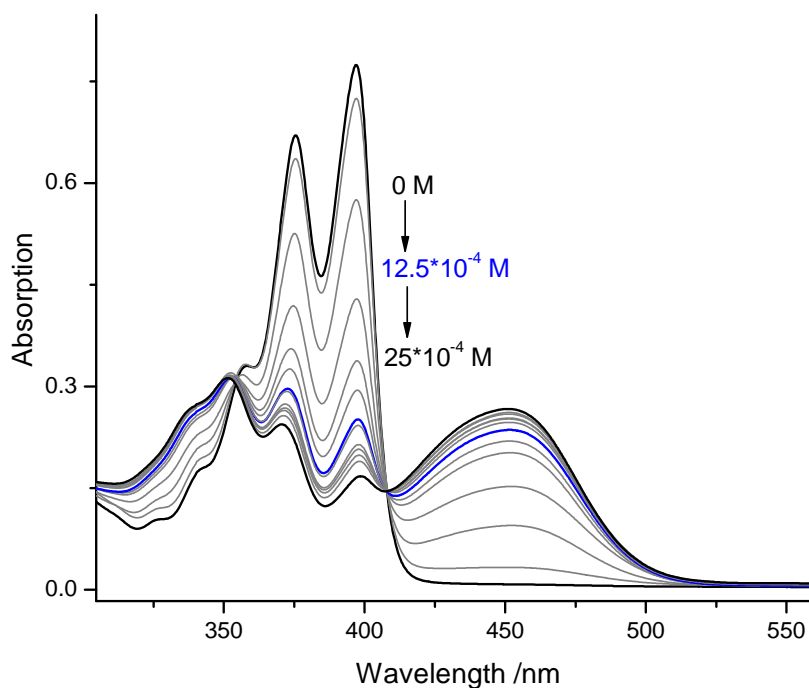

**Fig. S2.** UV-Vis of titration of **1b** ( $3.1 \times 10^{-5}$  M, 2mL) with TBAF in DCM (see also Table S1).

**Table S1.** UV-Vis titration of **1b** ( $3.1 \times 10^{-5}$  M, 2mL) with TBAF in DCM. Extinction coefficients are:

**1b:**  $\epsilon_{397\text{nm}} = 33,500 \text{ cm}^{-1} \text{ M}^{-1}$ ;  $\epsilon_{453\text{nm}} = 0$ ; **1b:F<sup>-</sup>:**  $\epsilon_{397\text{nm}} = 13,300 \text{ cm}^{-1} \text{ M}^{-1}$ ;  $\epsilon_{453\text{nm}} = 4,000$

| [TBAF] <sub>0</sub> | Abs <sub>397</sub> | Abs <sub>453</sub> |
|---------------------|--------------------|--------------------|
| 0                   | 0.7742             | 0.00776            |
| 0.000125            | 0.72405            | 0.03256            |
| 0.00025             | 0.5752             | 0.09388            |
| 0.0005              | 0.4288             | 0.1523             |
| 0.00075             | 0.337              | 0.2018             |
| Abs0.001            | 0.29443            | 0.2189             |
| 0.00125             | 0.2512             | 0.2356             |
| 0.0015              | 0.242              | 0.2466             |
| 0.00175             | 0.214              | 0.2532             |
| 0.002               | 0.207              |                    |
| 0.00225             | 0.1975             | 0.259              |
| 0.0025              | 0.1893             |                    |

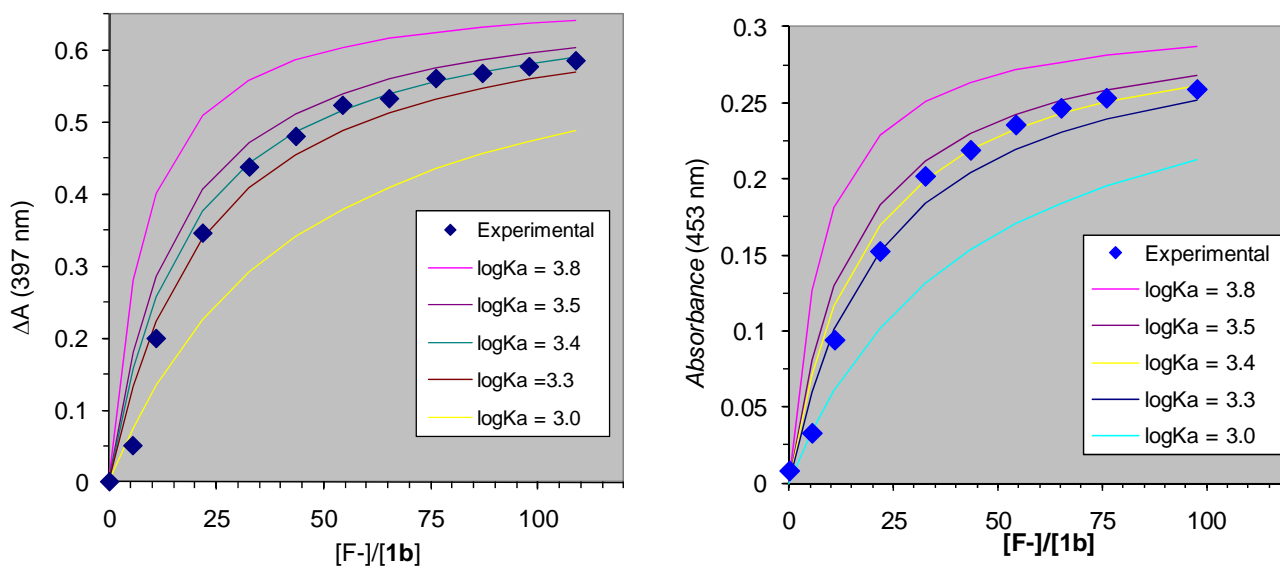

**Fig. S3.** Binding isotherms for **1b**:F<sup>-</sup> based on UV-Vis titration (Fig. S2, Table S1) measured by depletion of the **1b** absorption (397 nm, left) and appearance of the **1b**:F<sup>-</sup> absorption (453 nm, right).

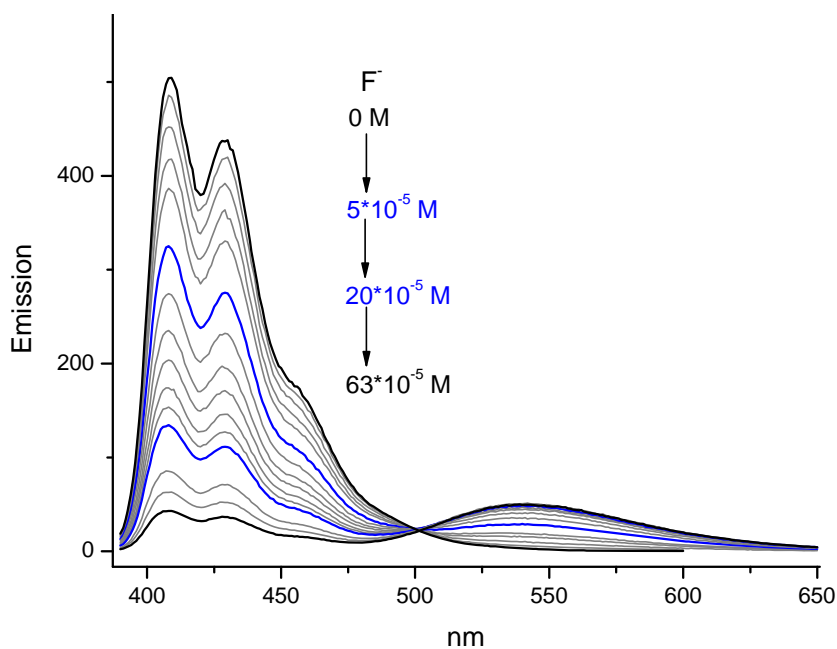

**Fig, S4.** Fluorescence titration of **1b** ( $0.85 \times 10^{-5}$  M, 2 mL) with TBAF in DCM.

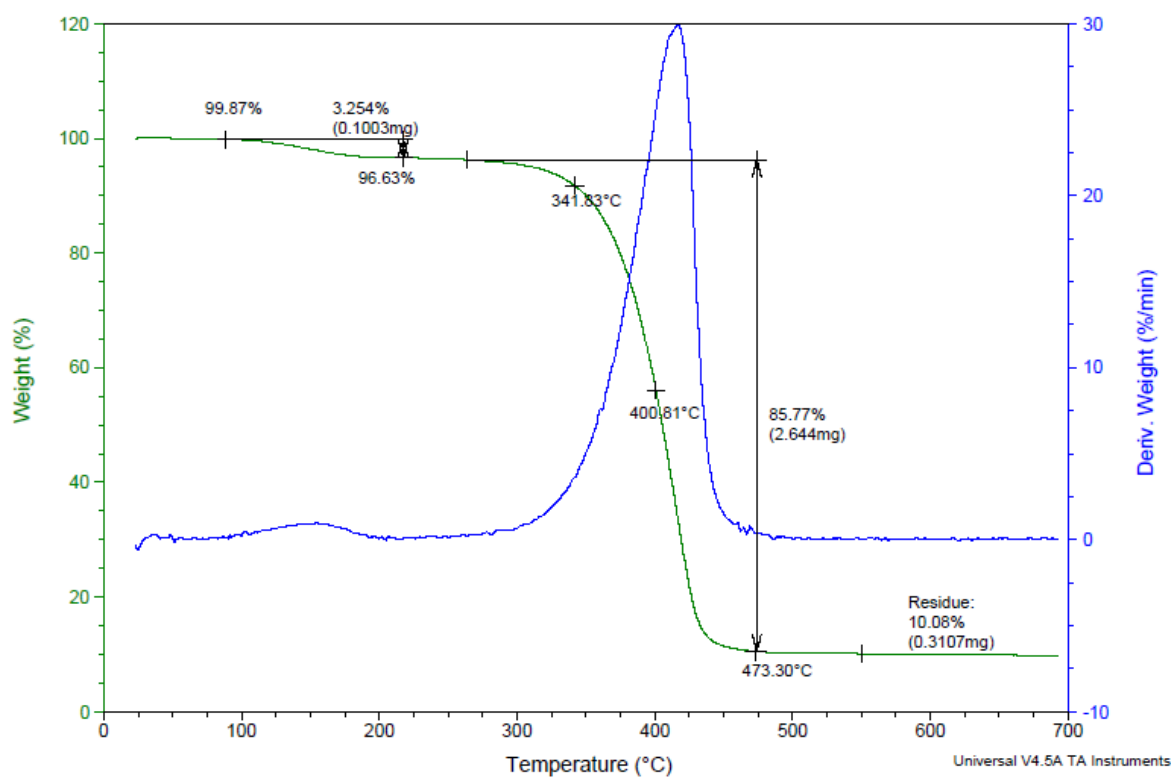

**Fig. S5.** Thermogravimetric analysis of azaborine **1a**. 3% mass loss at 100–150 °C is due to specifically bound molecule of water (hydrogen bonding to two N-H fragments; see X-ray data for **1a**).  $T_{\text{dec}} \sim 300^\circ\text{C}$  (based on 5% mass loss).

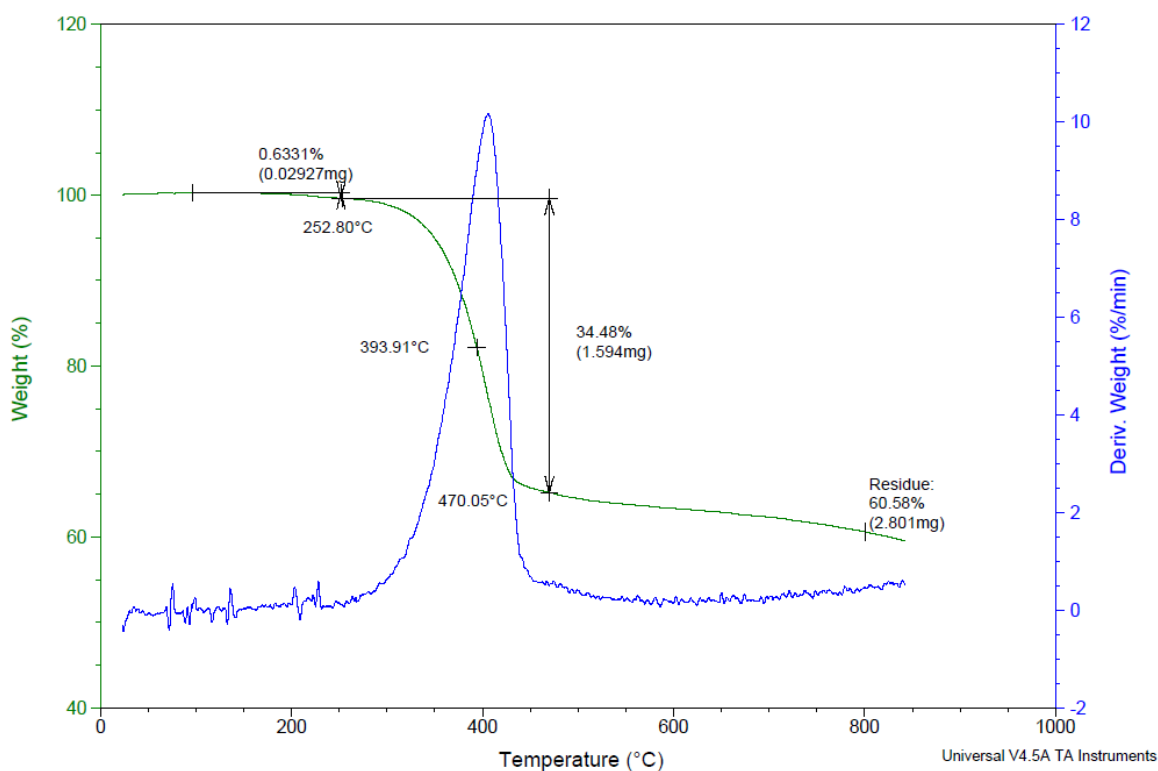

**Fig. S6.** Thermogravimetric analysis of azaborine **1b**.  $T_{\text{dec}} \sim 300^\circ\text{C}$  (based on 5% mass loss).



17L375-1

OK

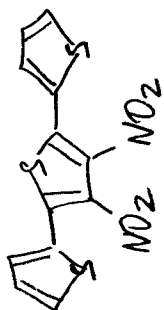

STANDARD 1H OBSERVE

Pulse Sequence: s2pu1

Solvent: CDCl3

Ambient temperature

Mercury-300 "m300"

Relax. delay 1.000 sec

Pulse 58.9 degrees

Acq. time 1.995 sec

Width 4506.5 Hz

12 repetitions

OBSERVE H1 300.0549900 MHZ

DATA PROCESSING

FT size 32768

Total time 0 min, 0 sec

7.162  
7.165  
7.175  
7.178  
7.181  
7.191  
7.194

7.618  
7.615  
7.605  
7.602  
7.598  
7.558  
7.555  
7.551

7.622

7.545  
7.542  
7.539  
7.260  
7.257

ppm

1

2

3

4

5

6

7

8

9

31.29 36.31  
32.39

Compound 5

ML 377-1

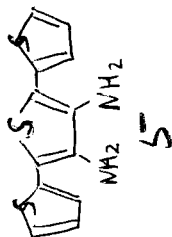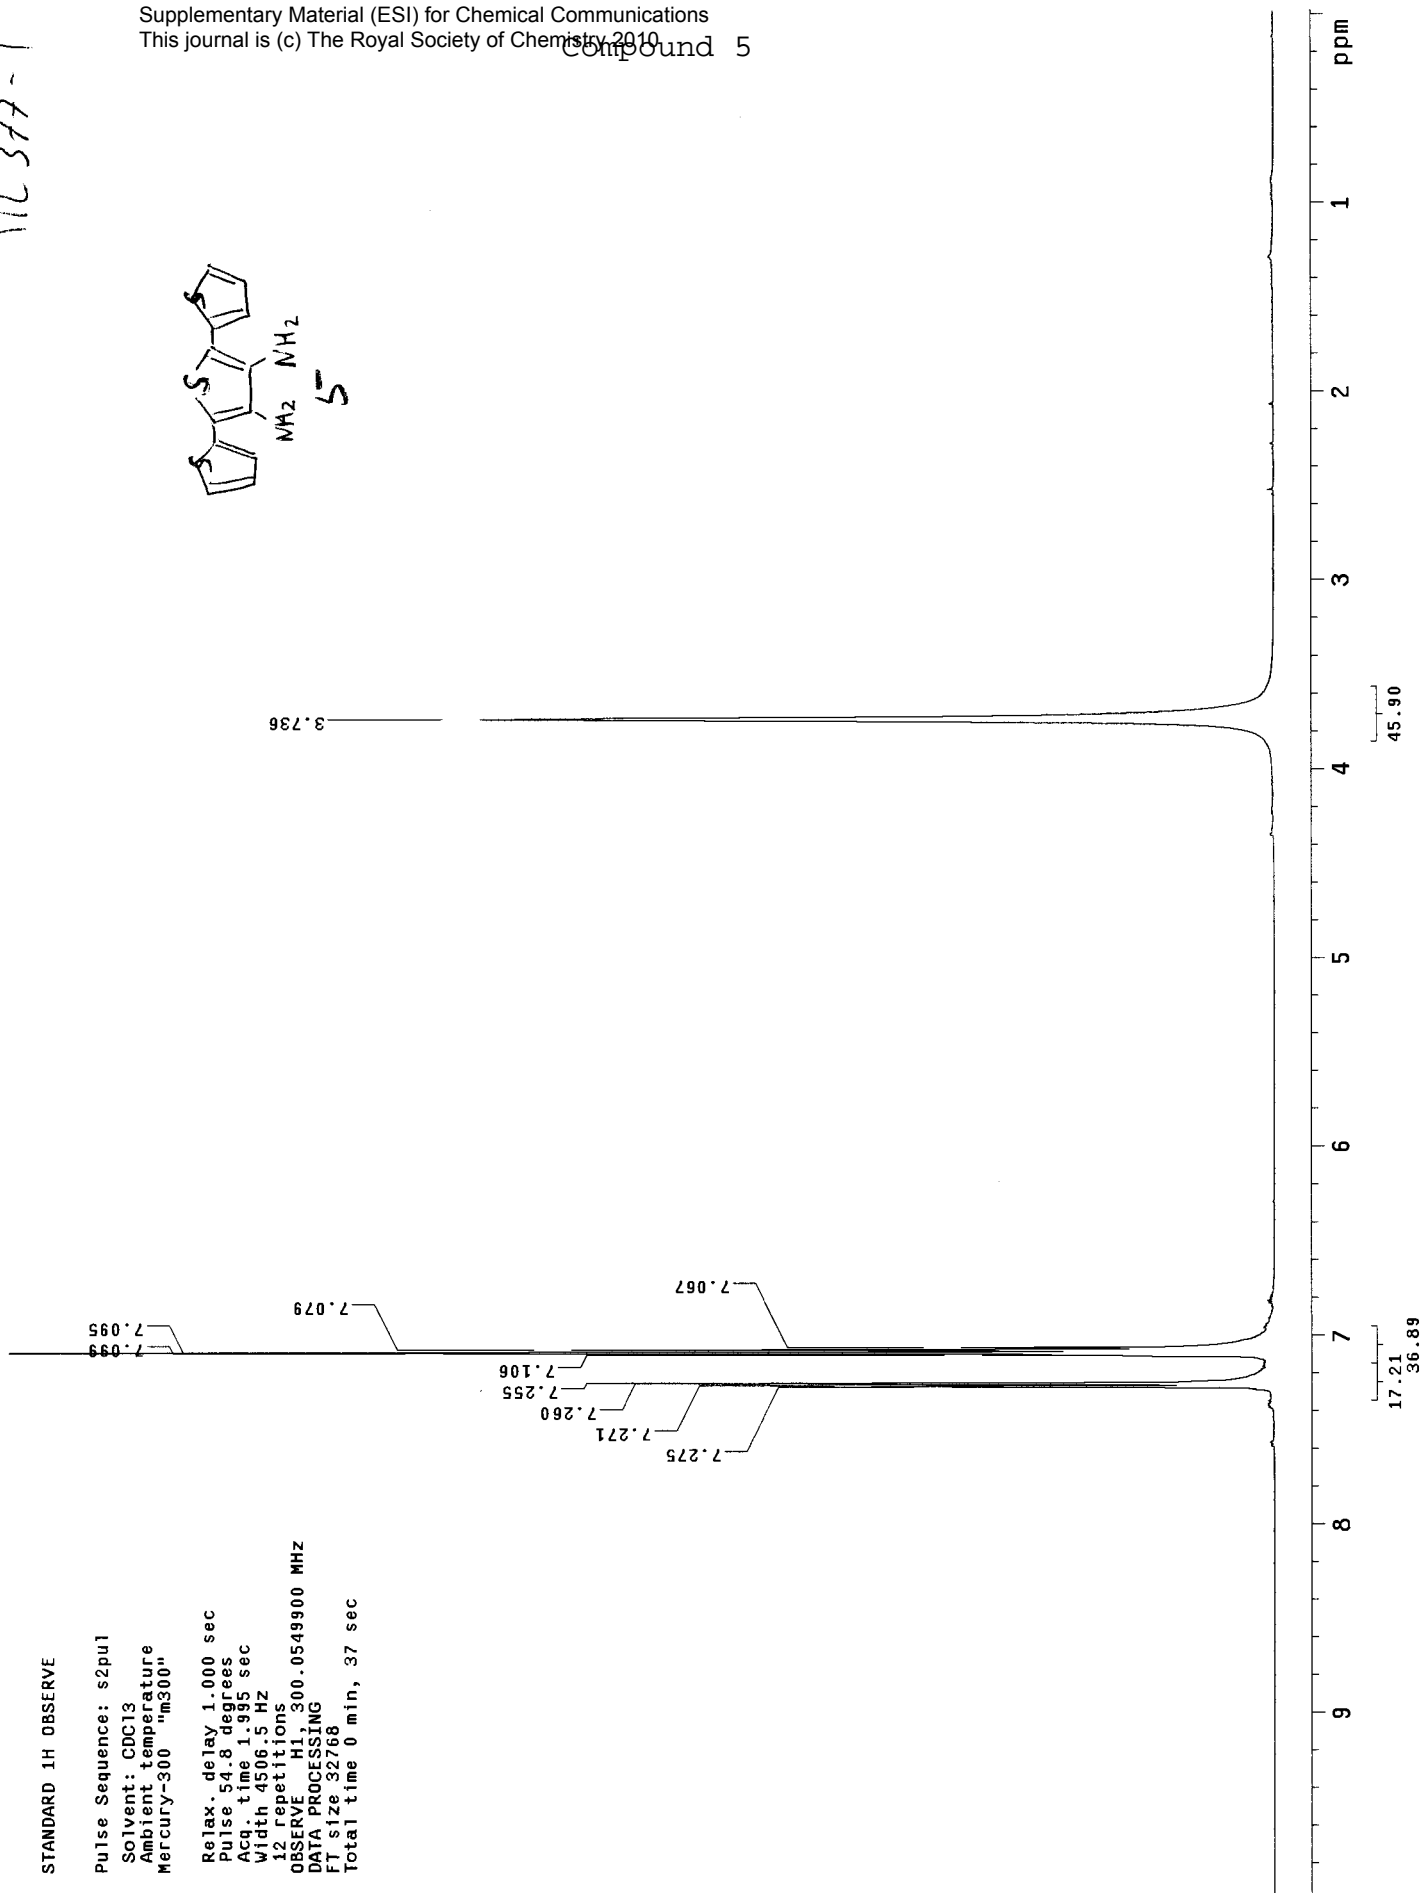

STANDARD 1H OBSERVE

Pulse Sequence: s2pu1

Solvent: CDCl<sub>3</sub>

Ambient temperature

Mercury-300 "m300"

Relax. delay 1.000 sec

Pulse 54.8 degrees

Acq. time 1.995 sec

Width 4506.5 Hz

12 repetitions

OBSERVE H1 300.0549900 MHz

DATA PROCESSING

FT size 32768

total time 0 min, 37 sec

Compound 2

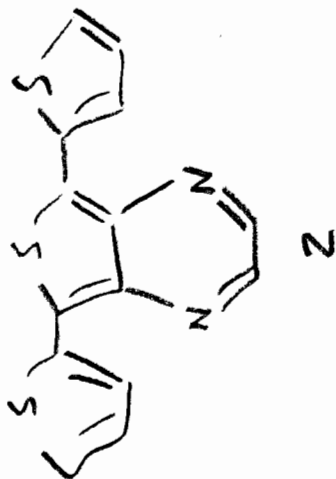

STANDARD 1H OBSERVE

Data Collected on:  
m400-mercury400  
Archive directory:  
/export/home/lmarc/vnmrSYS/data  
Sample directory:

File: PROTON

Pulse Sequence: s2pul  
Solvent: CDC13

Relax. delay 1.000 sec  
Pulse 45.0 degrees  
Acq. time 1.995 sec  
width 6410.3 Hz  
12 repetitions

OBSERVE H1, 400.1219604 MHz  
DATA PROCESSING  
FT size 32768  
Total time 0 min

8.535

0.54

7.653  
7.650  
7.643  
7.640  
7.427  
7.424  
7.148  
7.139  
7.135  
7.126

7.414  
7.411  
7.263

ppm

1

2

3

4

5

6

7

8

9

25.51

23.73 24.06 26.70

26.70

```

Data Collected on:
m40-mercury400
Archive directory:
/export/home/lmarc/vnmr/sys/data
sample directory:

```

Pulse Sequence: s2pu1  
Solvent: CDC13

Relax. delay 1.000 sec  
Pulse 45.0 degrees  
Acq. time 1.995 sec  
Wd 6410.3 Hz  
12 repetitions  
OBSERVE H1, 400.121960  
DATA PROCESSING  
FT size 32768  
Total time 0 min

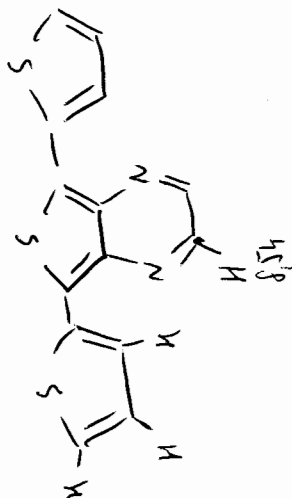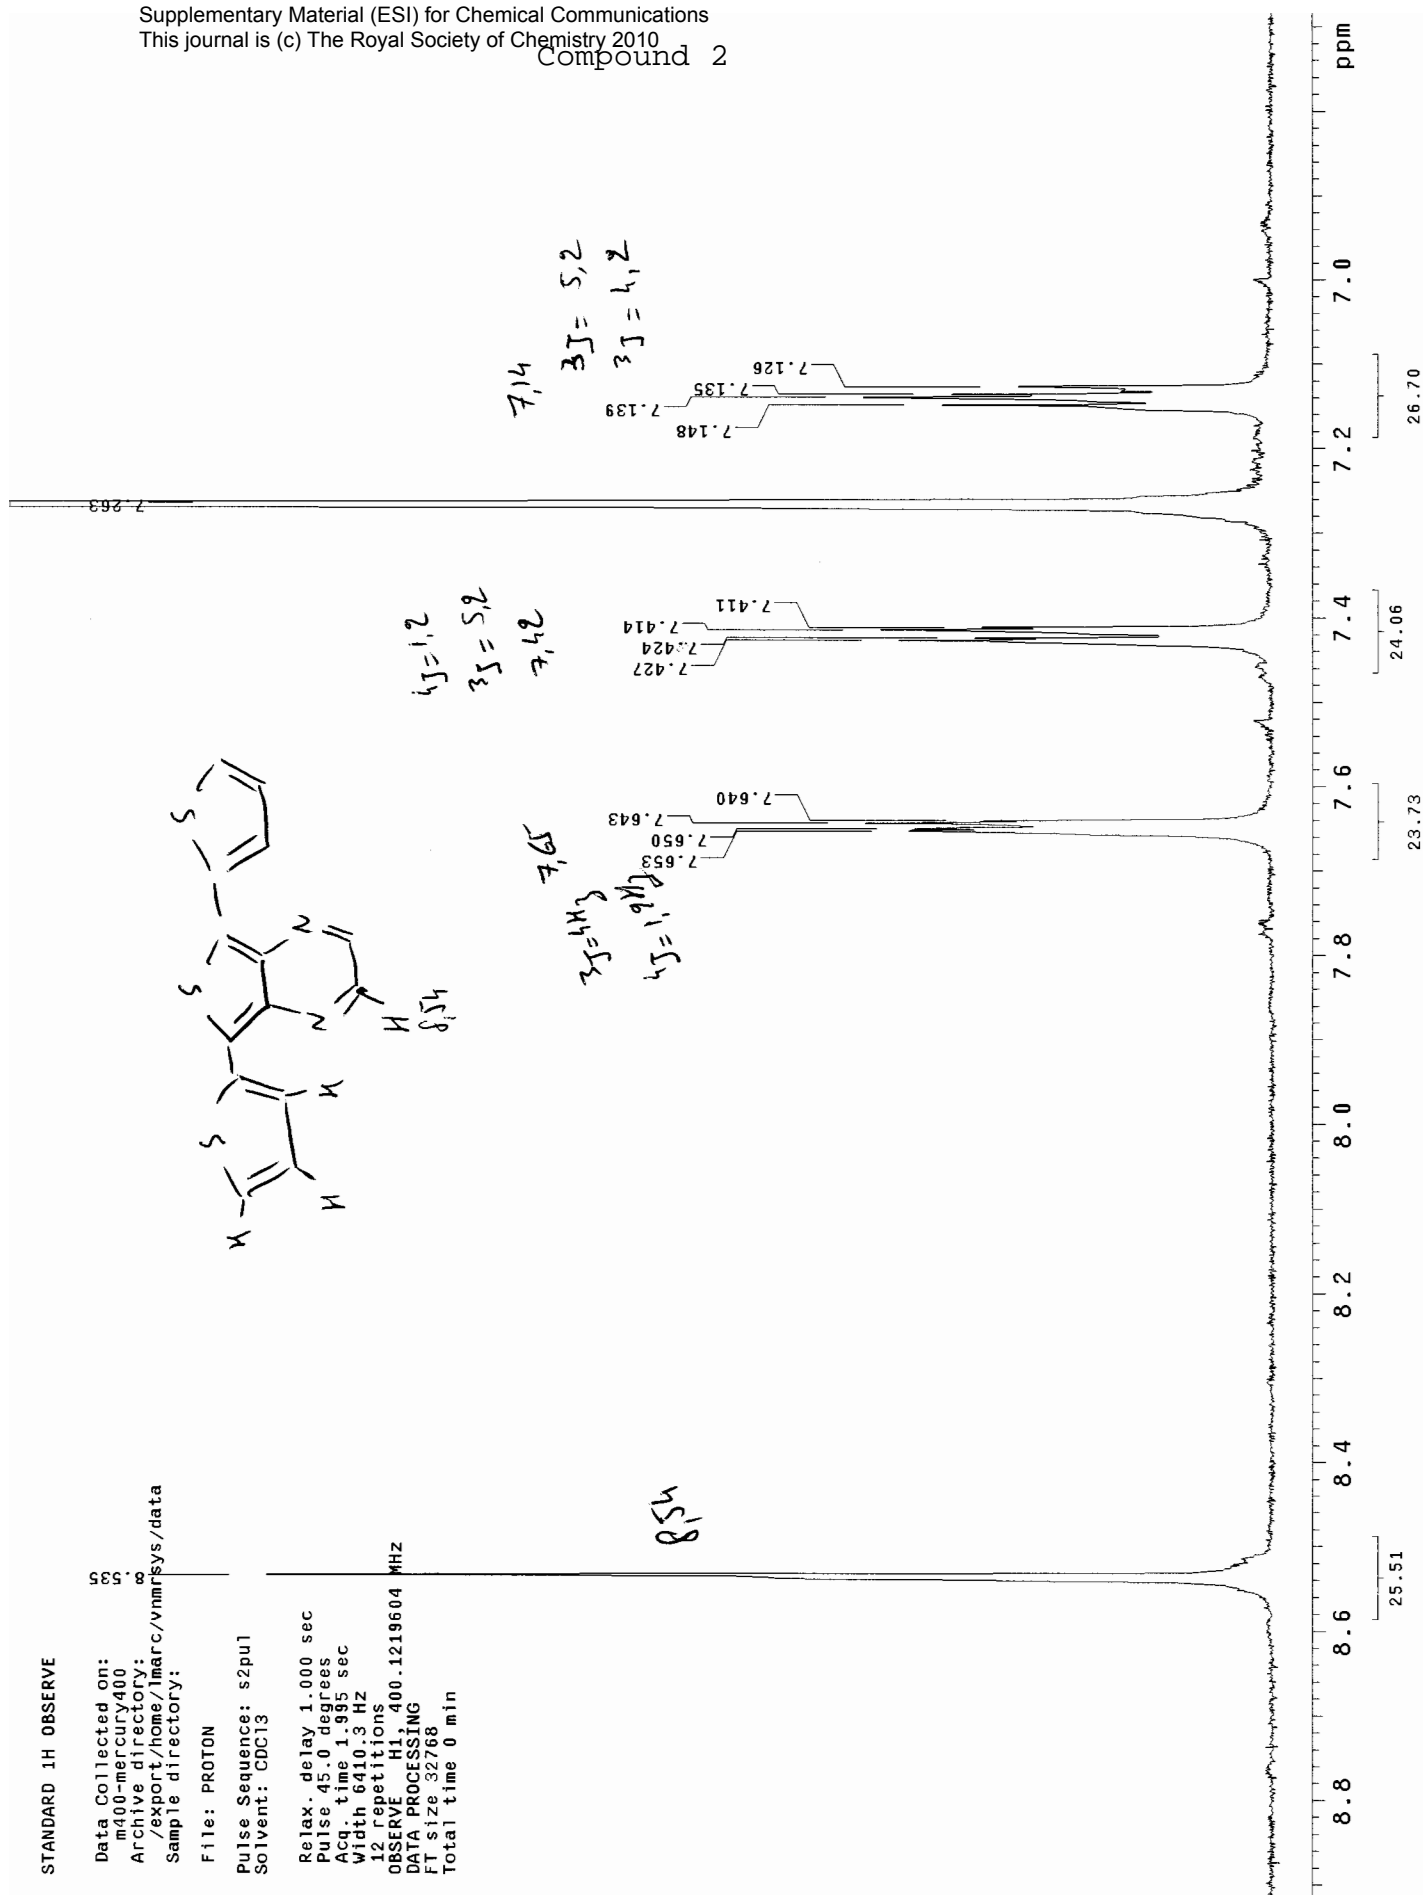

3

Rc1c(R)sc2c1[nH]c[nH]2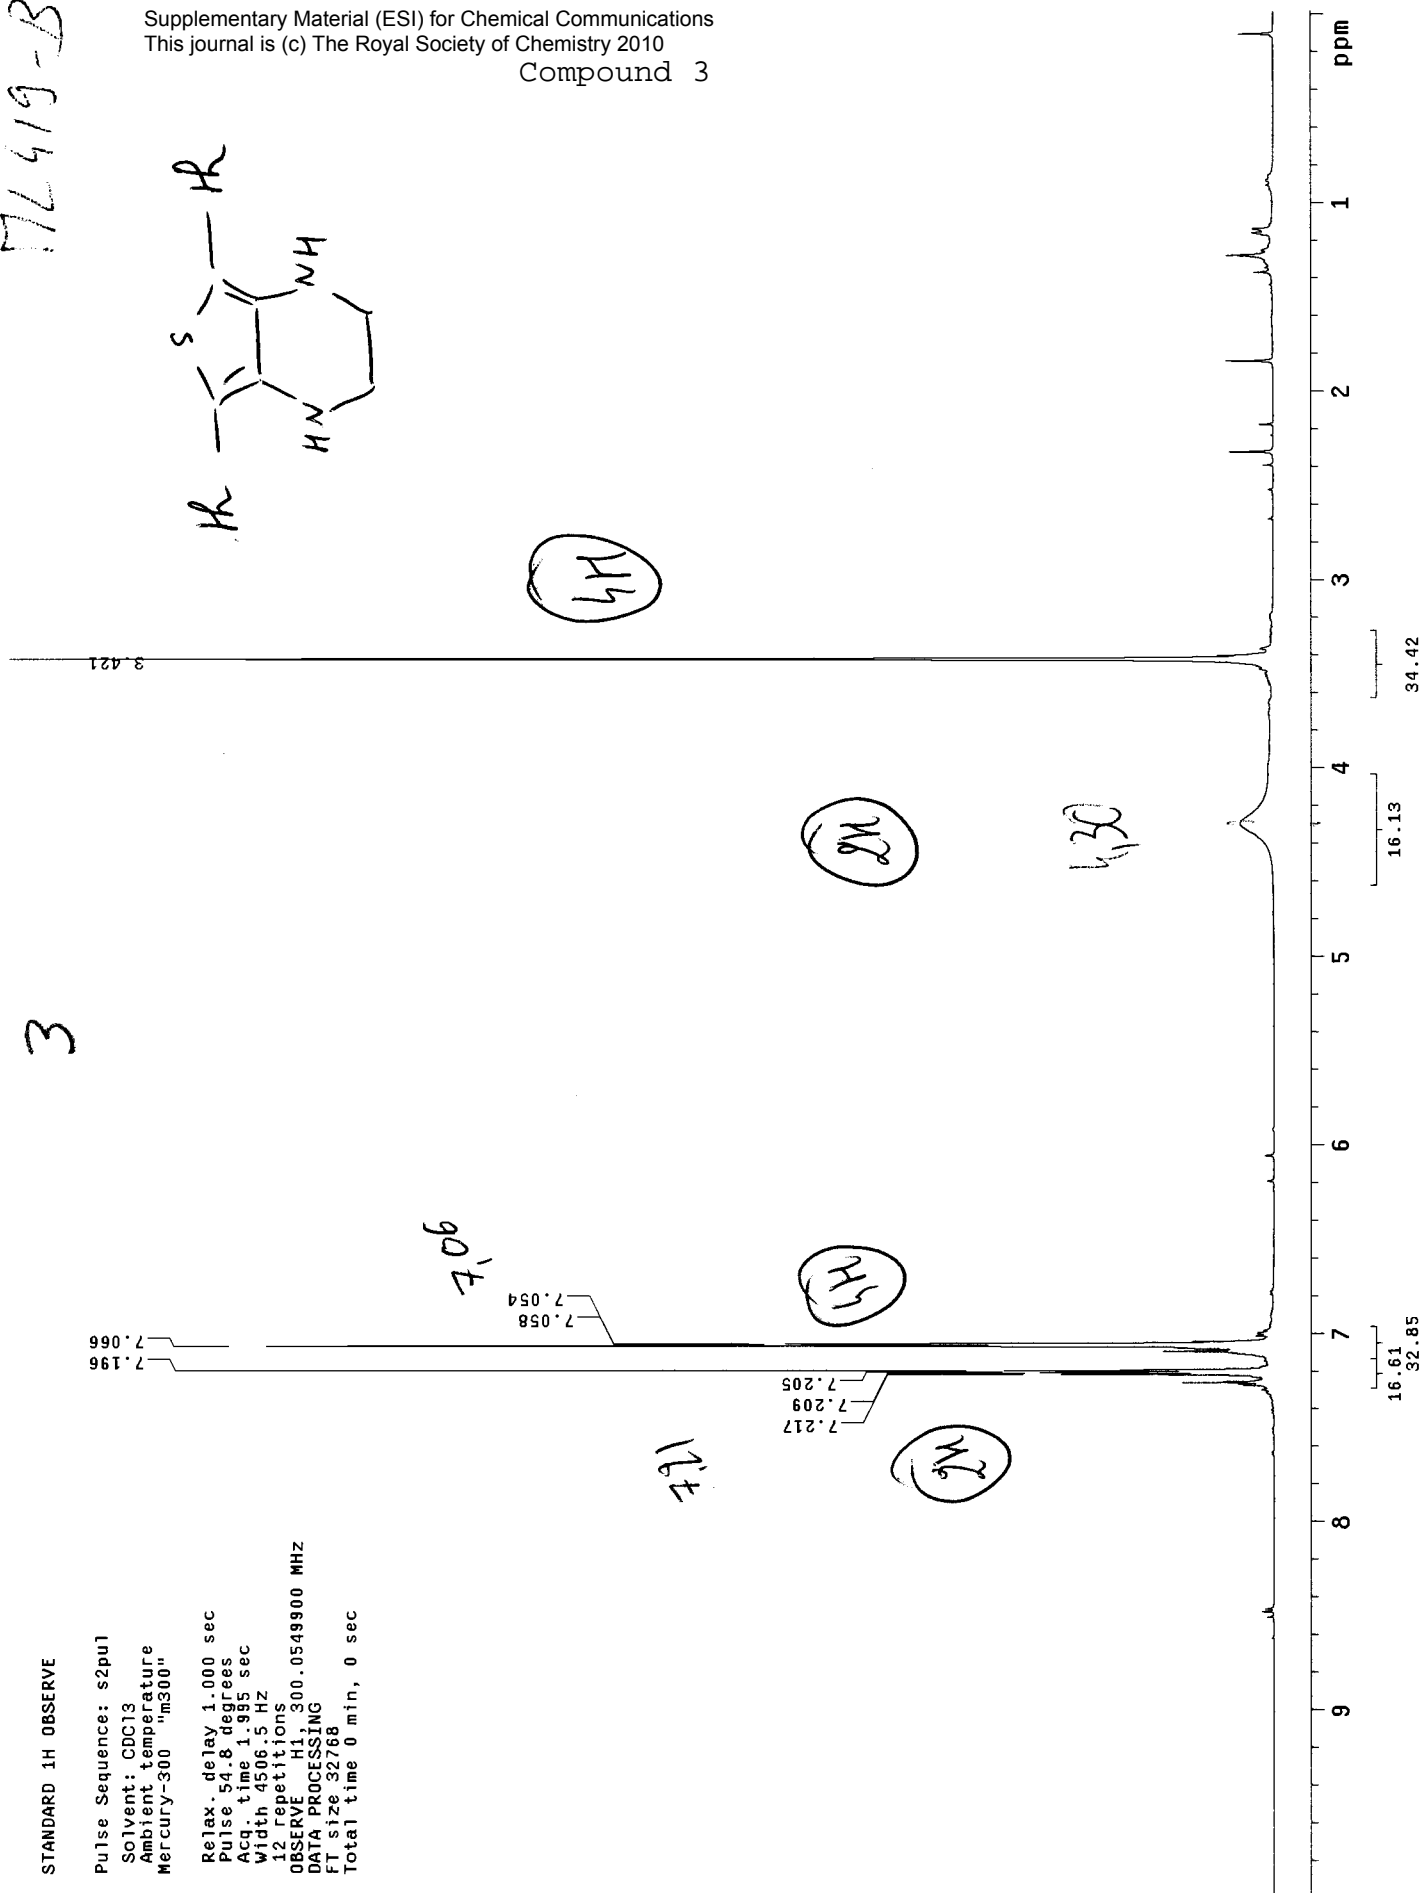

Compound 1a

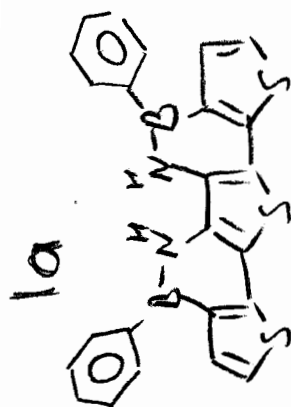

STANDARD 1H OBSERVE

Data Collected on:  
m400-mercury400  
Archive directory:  
/export/home/lmarc/vnmrsys/data  
Sample directory:

File: PROTON

Pulse Sequence: s2pu1  
Solvent: CDCl3

Relax. delay 1.000 sec  
Pulse 45.0 degrees  
Acq. time 1.995 sec  
Width 6410.3 Hz  
12 repetitions

OBSERVE H1, 400.1219604 MHZ  
DATA PROCESSING  
FT size 32768  
Total time 0 min

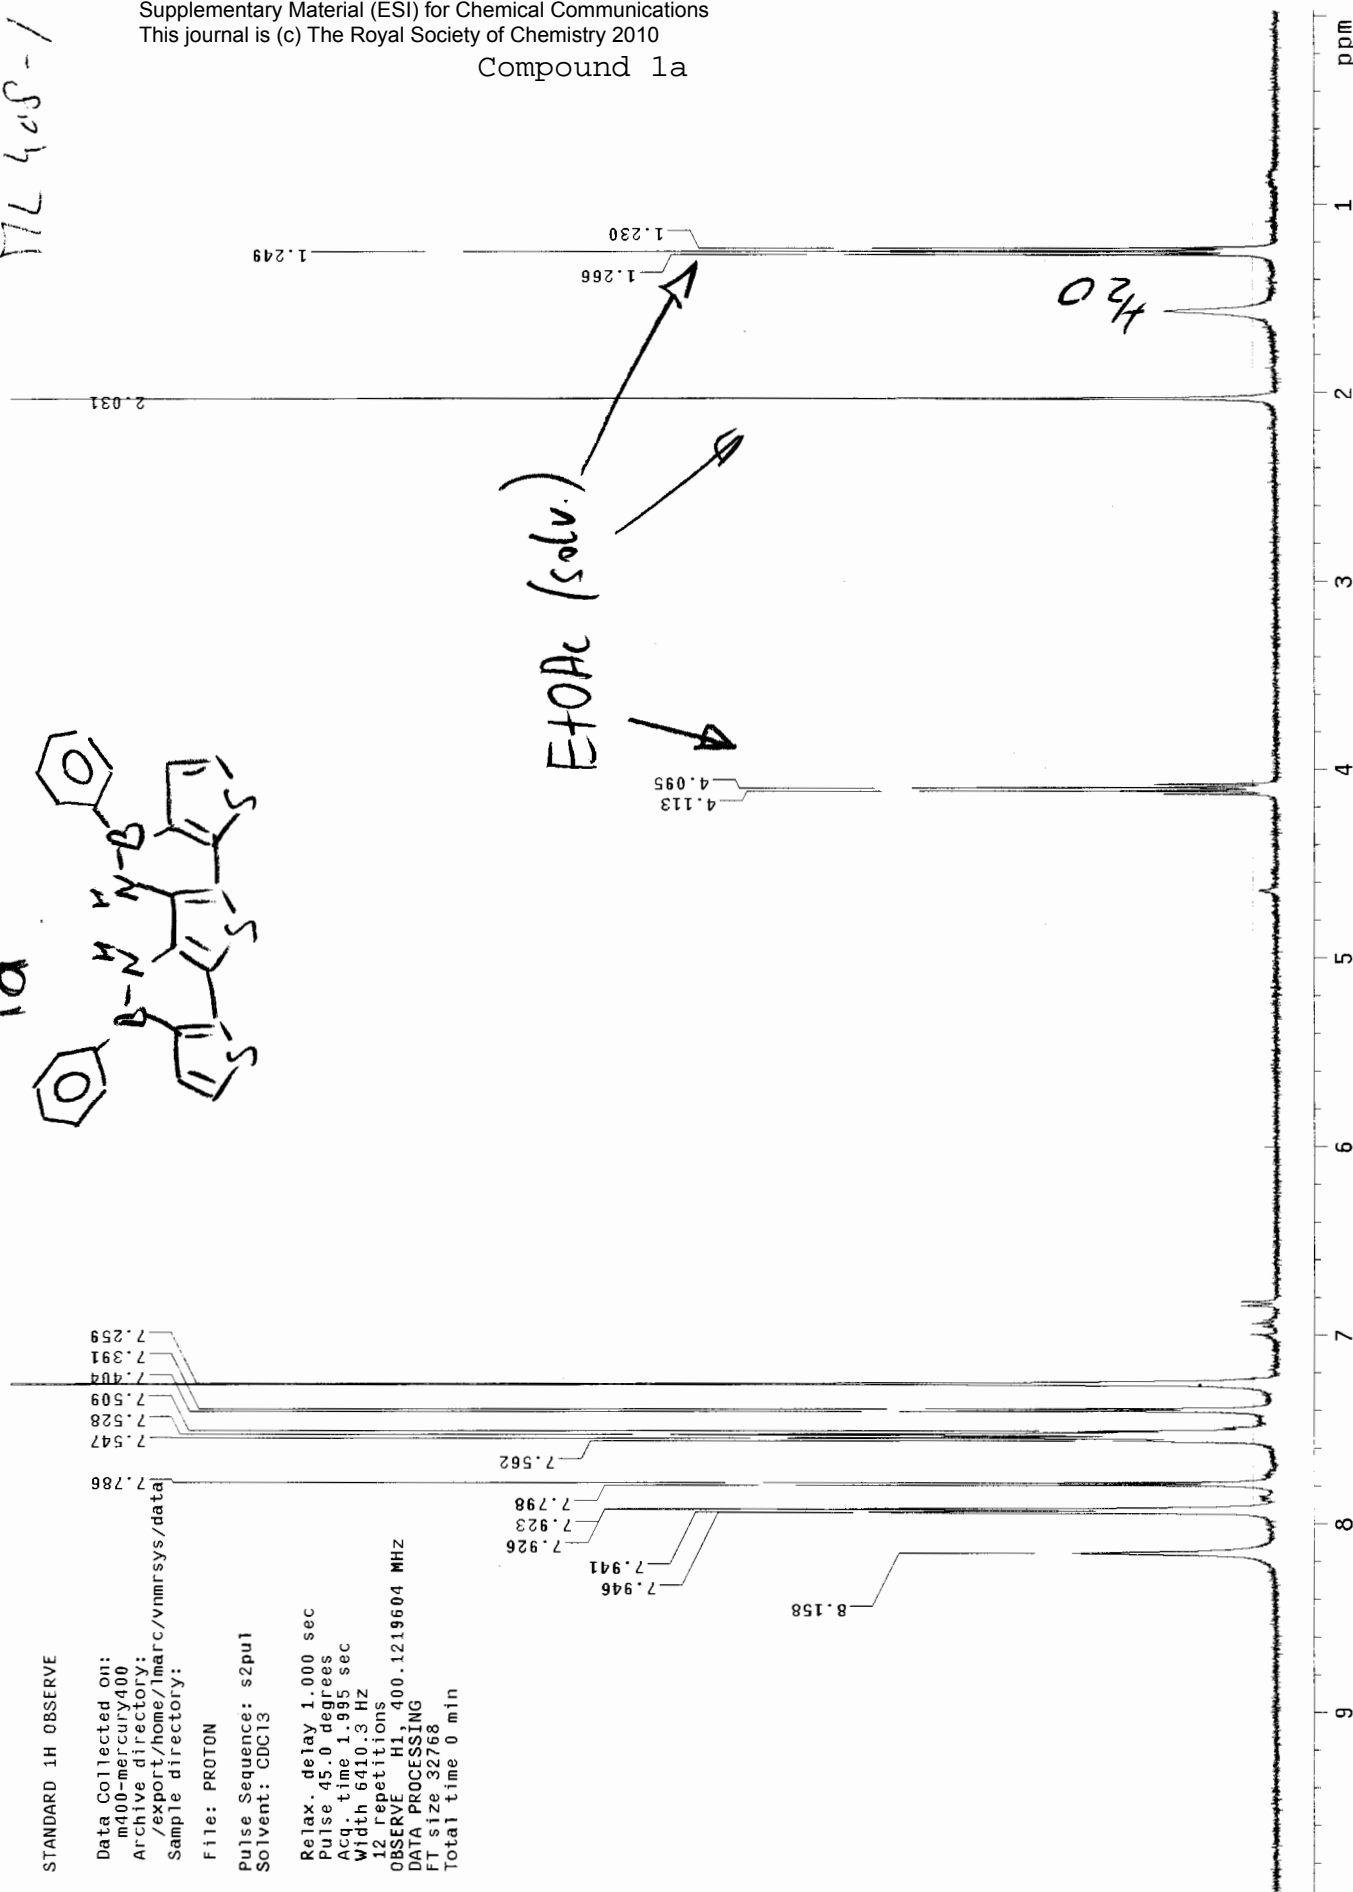

8.158  
7.946  
7.941  
7.926  
7.923  
7.798  
7.562  
7.786  
7.547  
7.528  
7.509  
7.494  
7.391  
7.259  
4.113  
4.095  
1.266  
1.230  
1.249  
2.031

Compound 1b

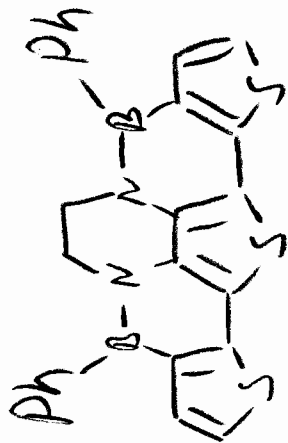

STANDARD 1H OBSERVE

Data Collected only:  
m400-mercury-400  
Archive directory:  
/export/home/ghena/vnmrSYS/data  
Sample directory:

File: PROTON

Pulse Sequence: s2pu1

Solvent: CDCl3

Relax. delay 1.000 sec

Pulse 45.0 degrees

Acq. time 1.999 sec

Width 6410.8 Hz

8 repetitions

OBSERVE H1, 400.1219604 MHz

DATA PROCESSING

FT size 65536

Total time 0 min

4.346  
4.344

1.552

7.677  
7.661  
7.658  
7.491  
7.488  
7.483  
7.480

7.262  
7.260

ppm

2

3

4

5

6

7

8

16-cdc13- 400 MHz

Compound 1b

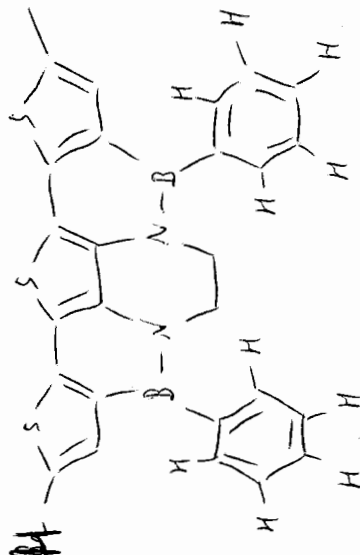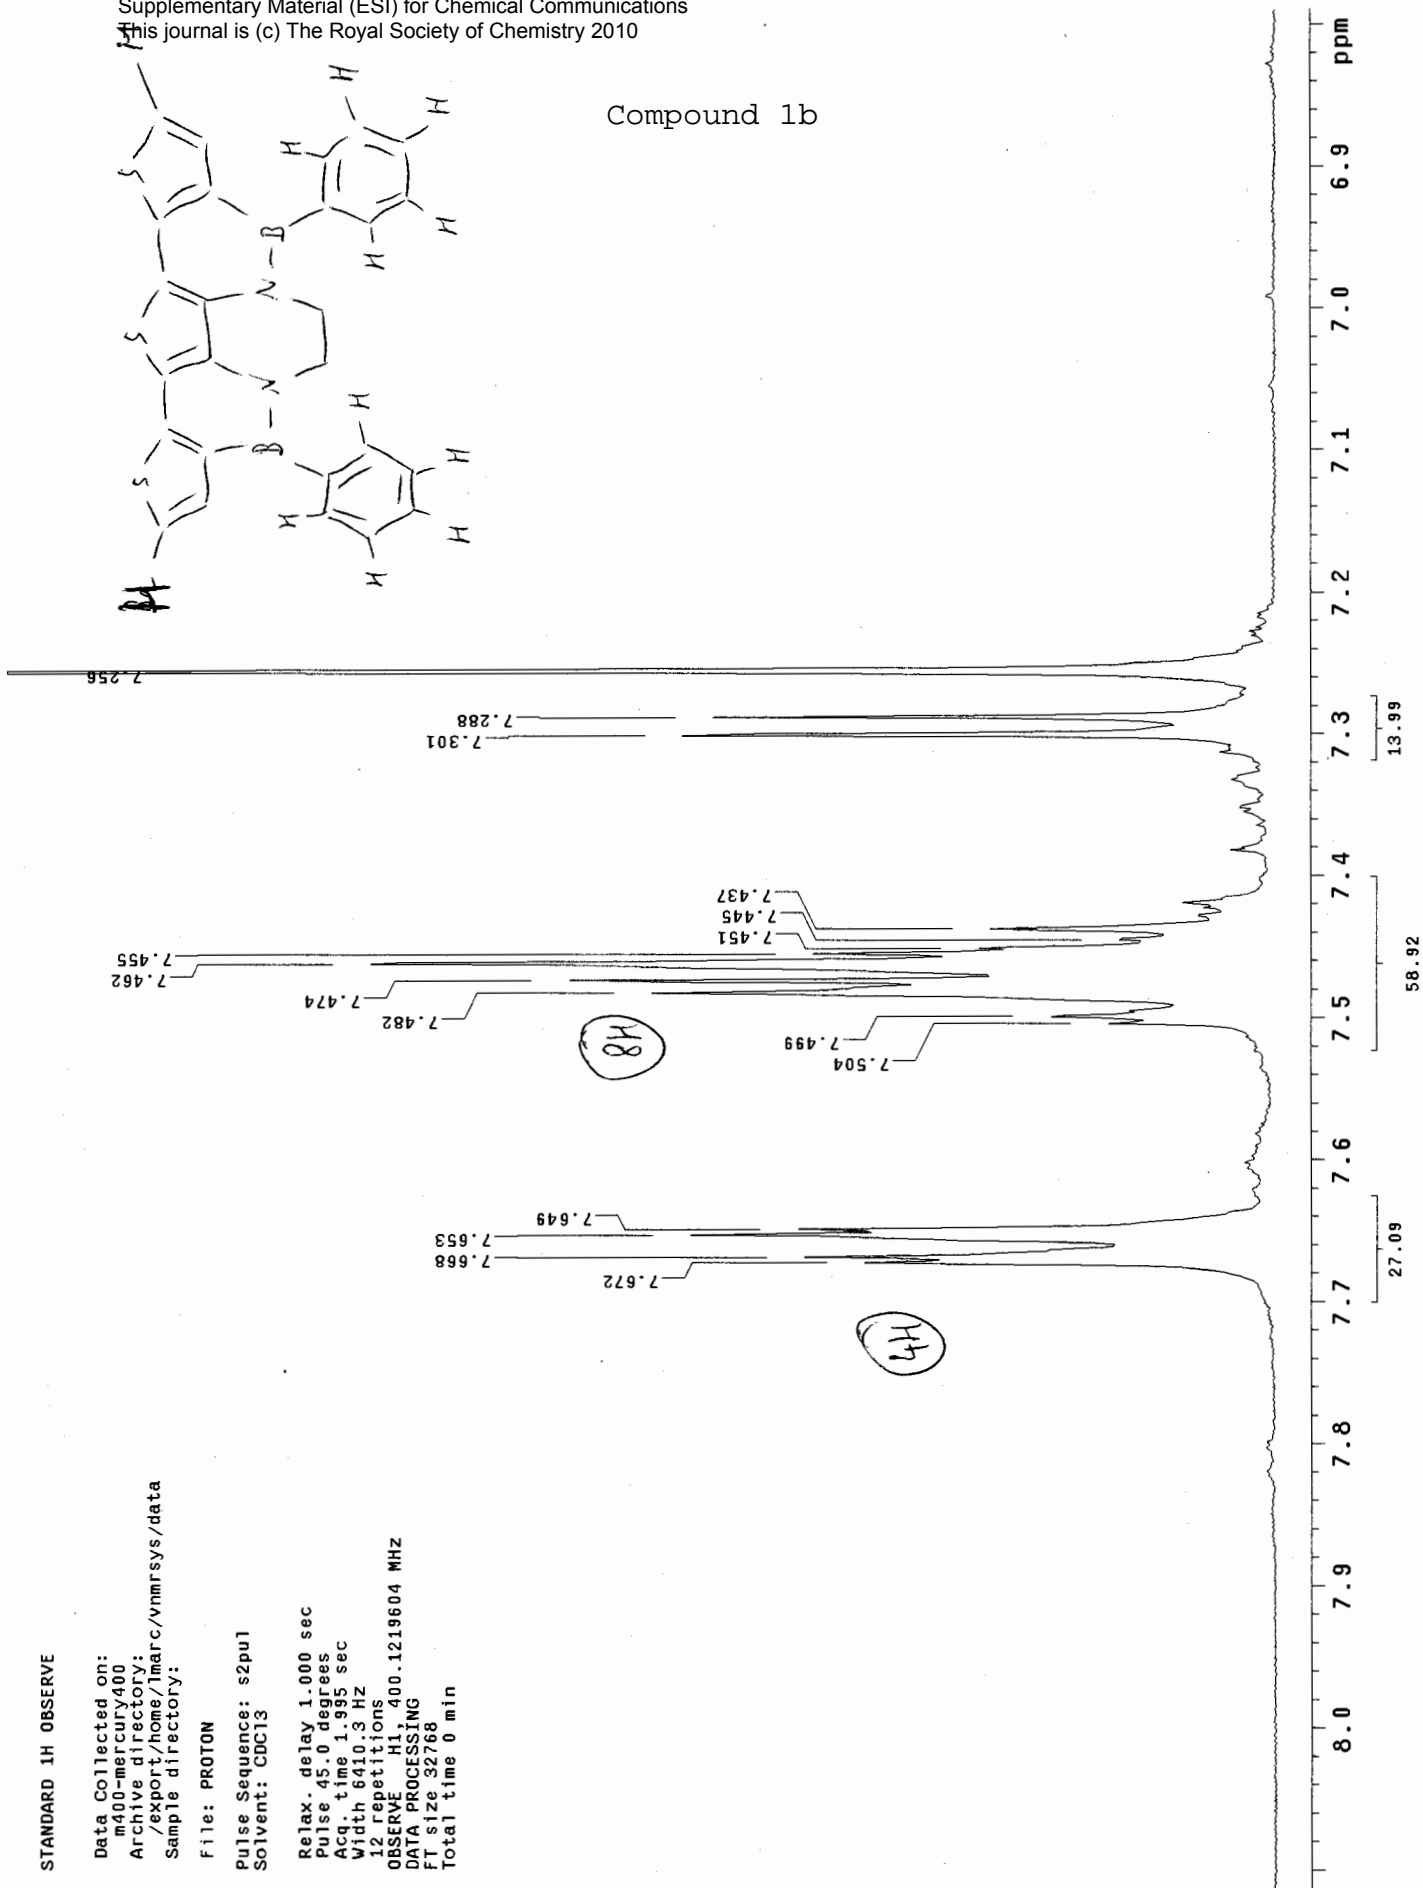

STANDARD 1H OBSERVE

Data Collected on:  
 mq00-mercury400  
 Archive directory:  
 /export/home/lmarc/vnmrsys/data  
 Sample directory:

File: PROTON

Pulse Sequence: s2pu1  
 Solvent: CDCl3

Relax. delay 1.000 sec  
 Pulse 45.0 degrees  
 Acq time 1.995 sec  
 Width 6410.3 Hz  
 12 repetitions

OBSERVE H1, 400.1219604 MHz  
 DATA PROCESSING  
 FT size 32768  
 Total time 0 min



Compound 1b

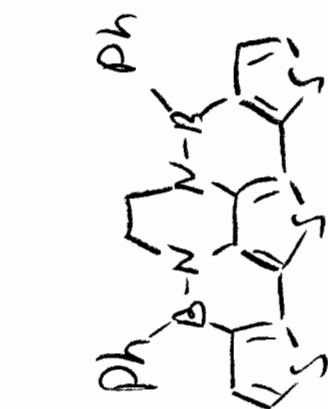

<sup>13</sup>C, 300MHz

<sup>13</sup>C OBSERVE

Pulse Sequence: s2pul  
Solvent: CDCl<sub>3</sub>  
Ambient temperature  
Mercury-300 "m300"

Relax. delay 1.500 sec  
Pulse 41.8 degrees  
Acq. time 1.815 sec  
Width 18761.7 Hz  
15000 repetitions  
OBSERVE C13, 75.4488692 MHz  
DECOUPLE H1, 300.0564325 MHz  
Power 34 dB  
continuously on  
WALTZ-16 modulated  
DATA PROCESSING  
Line broadening 1.0 Hz  
FT size 131072  
Total time 0 min, 0 sec

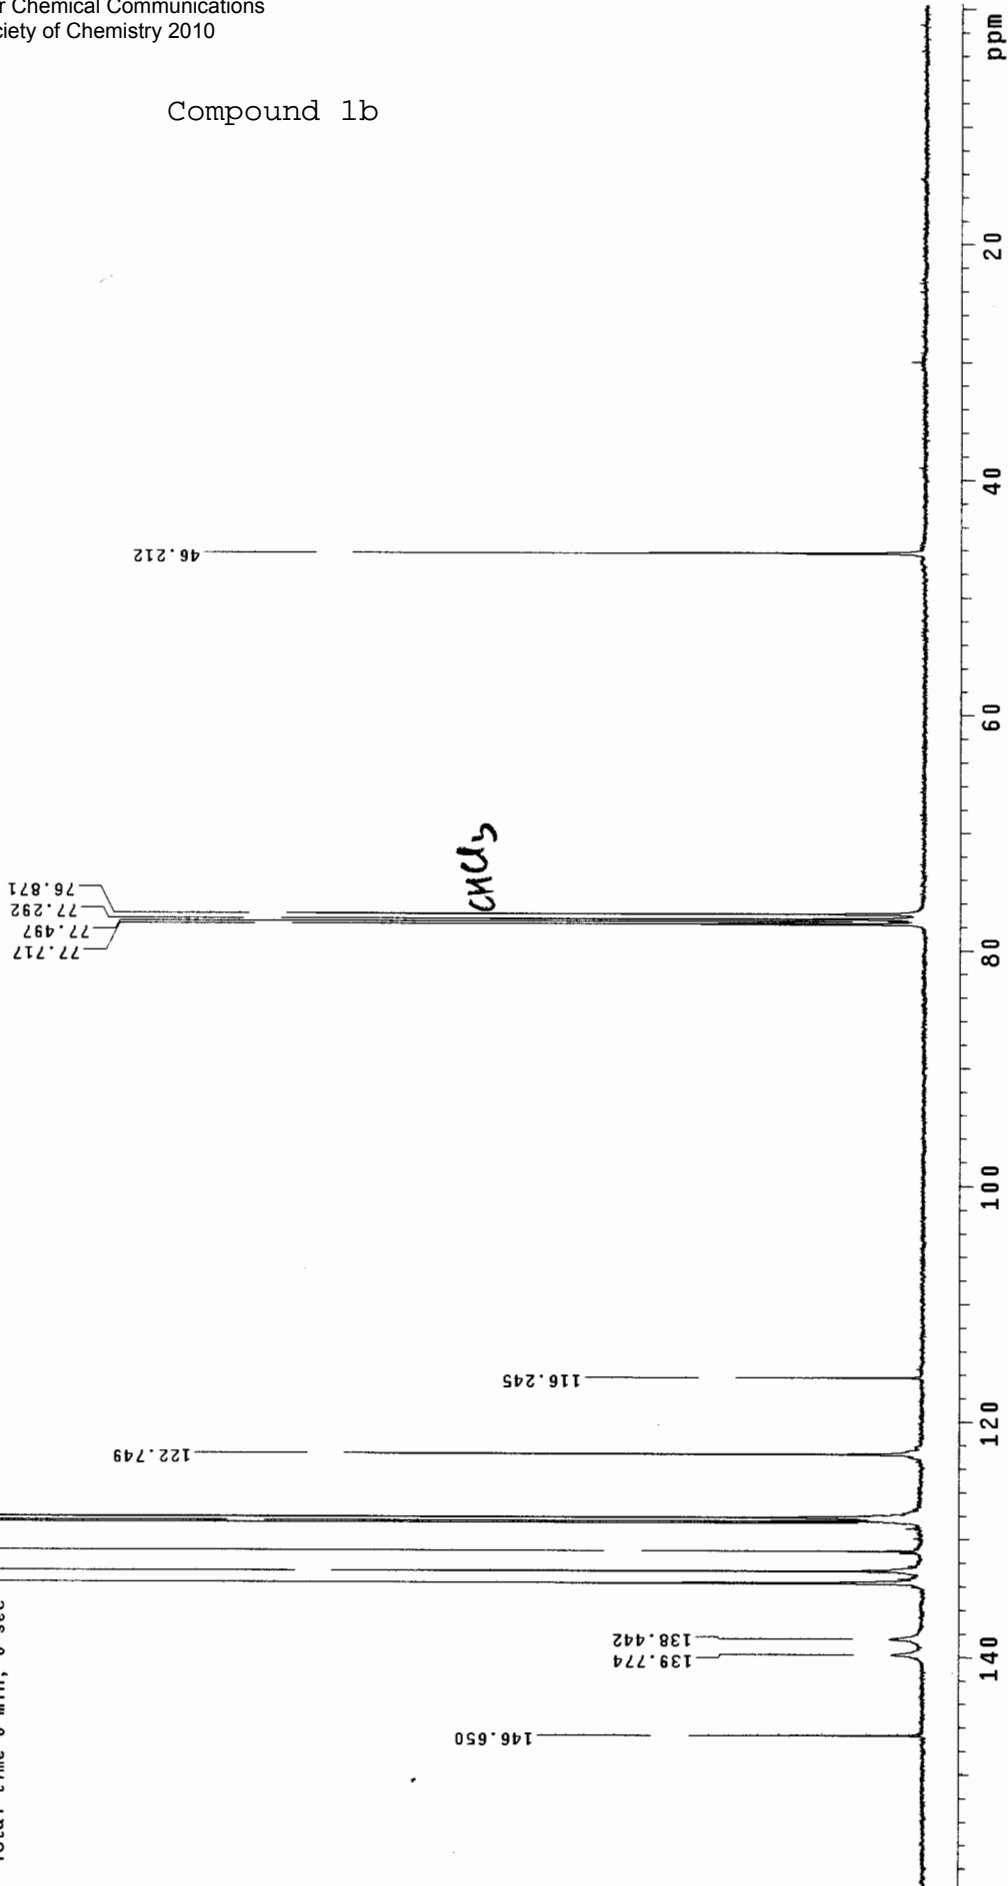

ML406 °C

Compound 1b

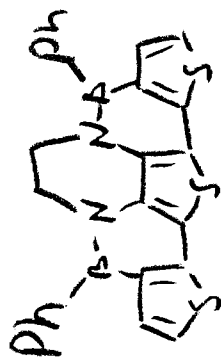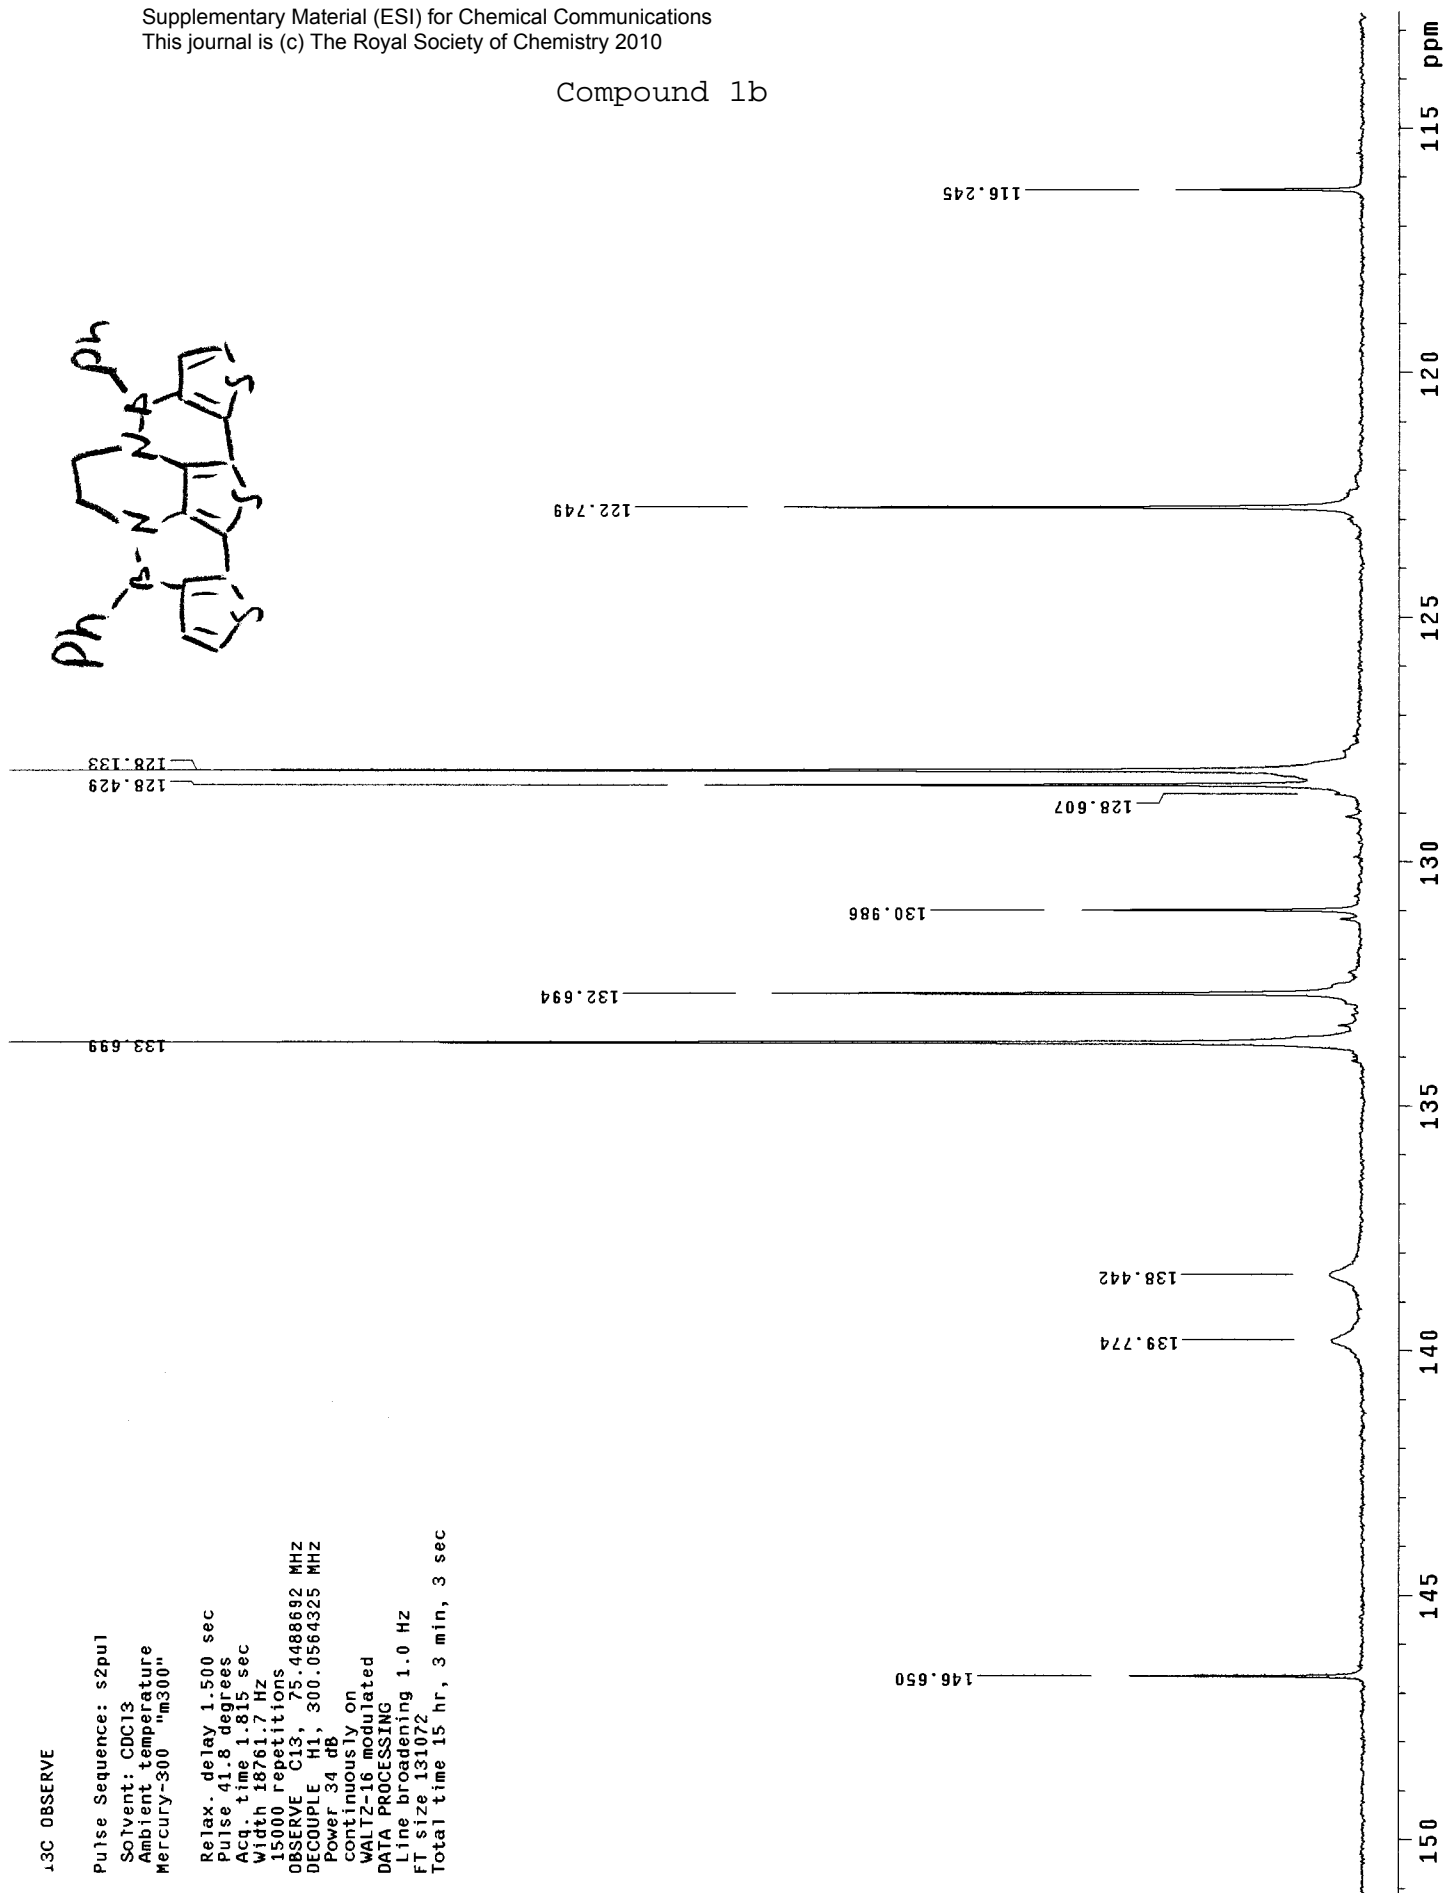

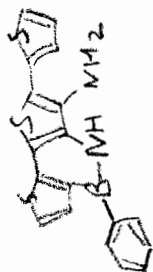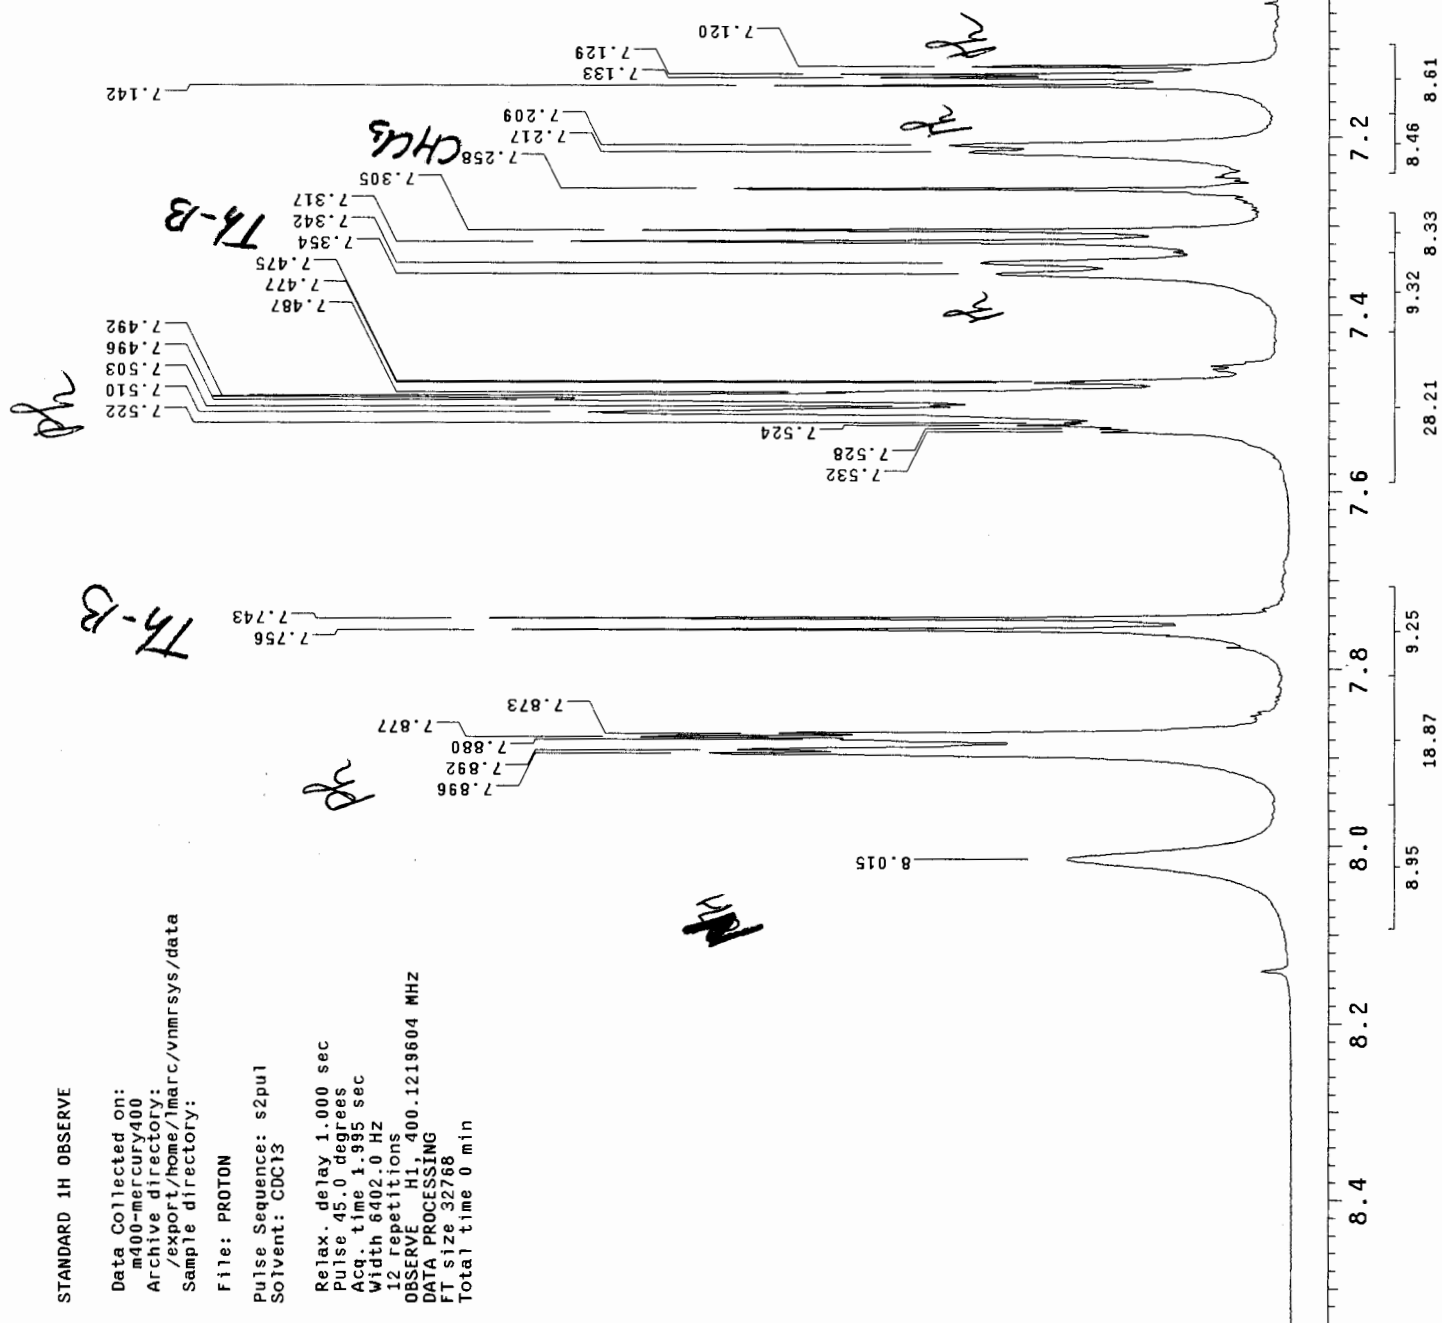

Supplement: c0cc01963a.pdf [file c0cc01963a.pdf]
